# Supplementary material for: Investigation on the Effects of Combined Application of Nitrogen Fertilizer and Humic Acid on the Root Morphology and Physiological Characteristics of Quinoa in Dryland Environment
Source: Research Square preprint supplement (doi:10.21203/rs.3.rs-7750221/v1), 2025-11-17

# Investigation on the Effects of Combined Application of Nitrogen Fertilizer and Humic Acid on the Root Morphology and Physiological Characteristics of Quinoa in Dryland Environment

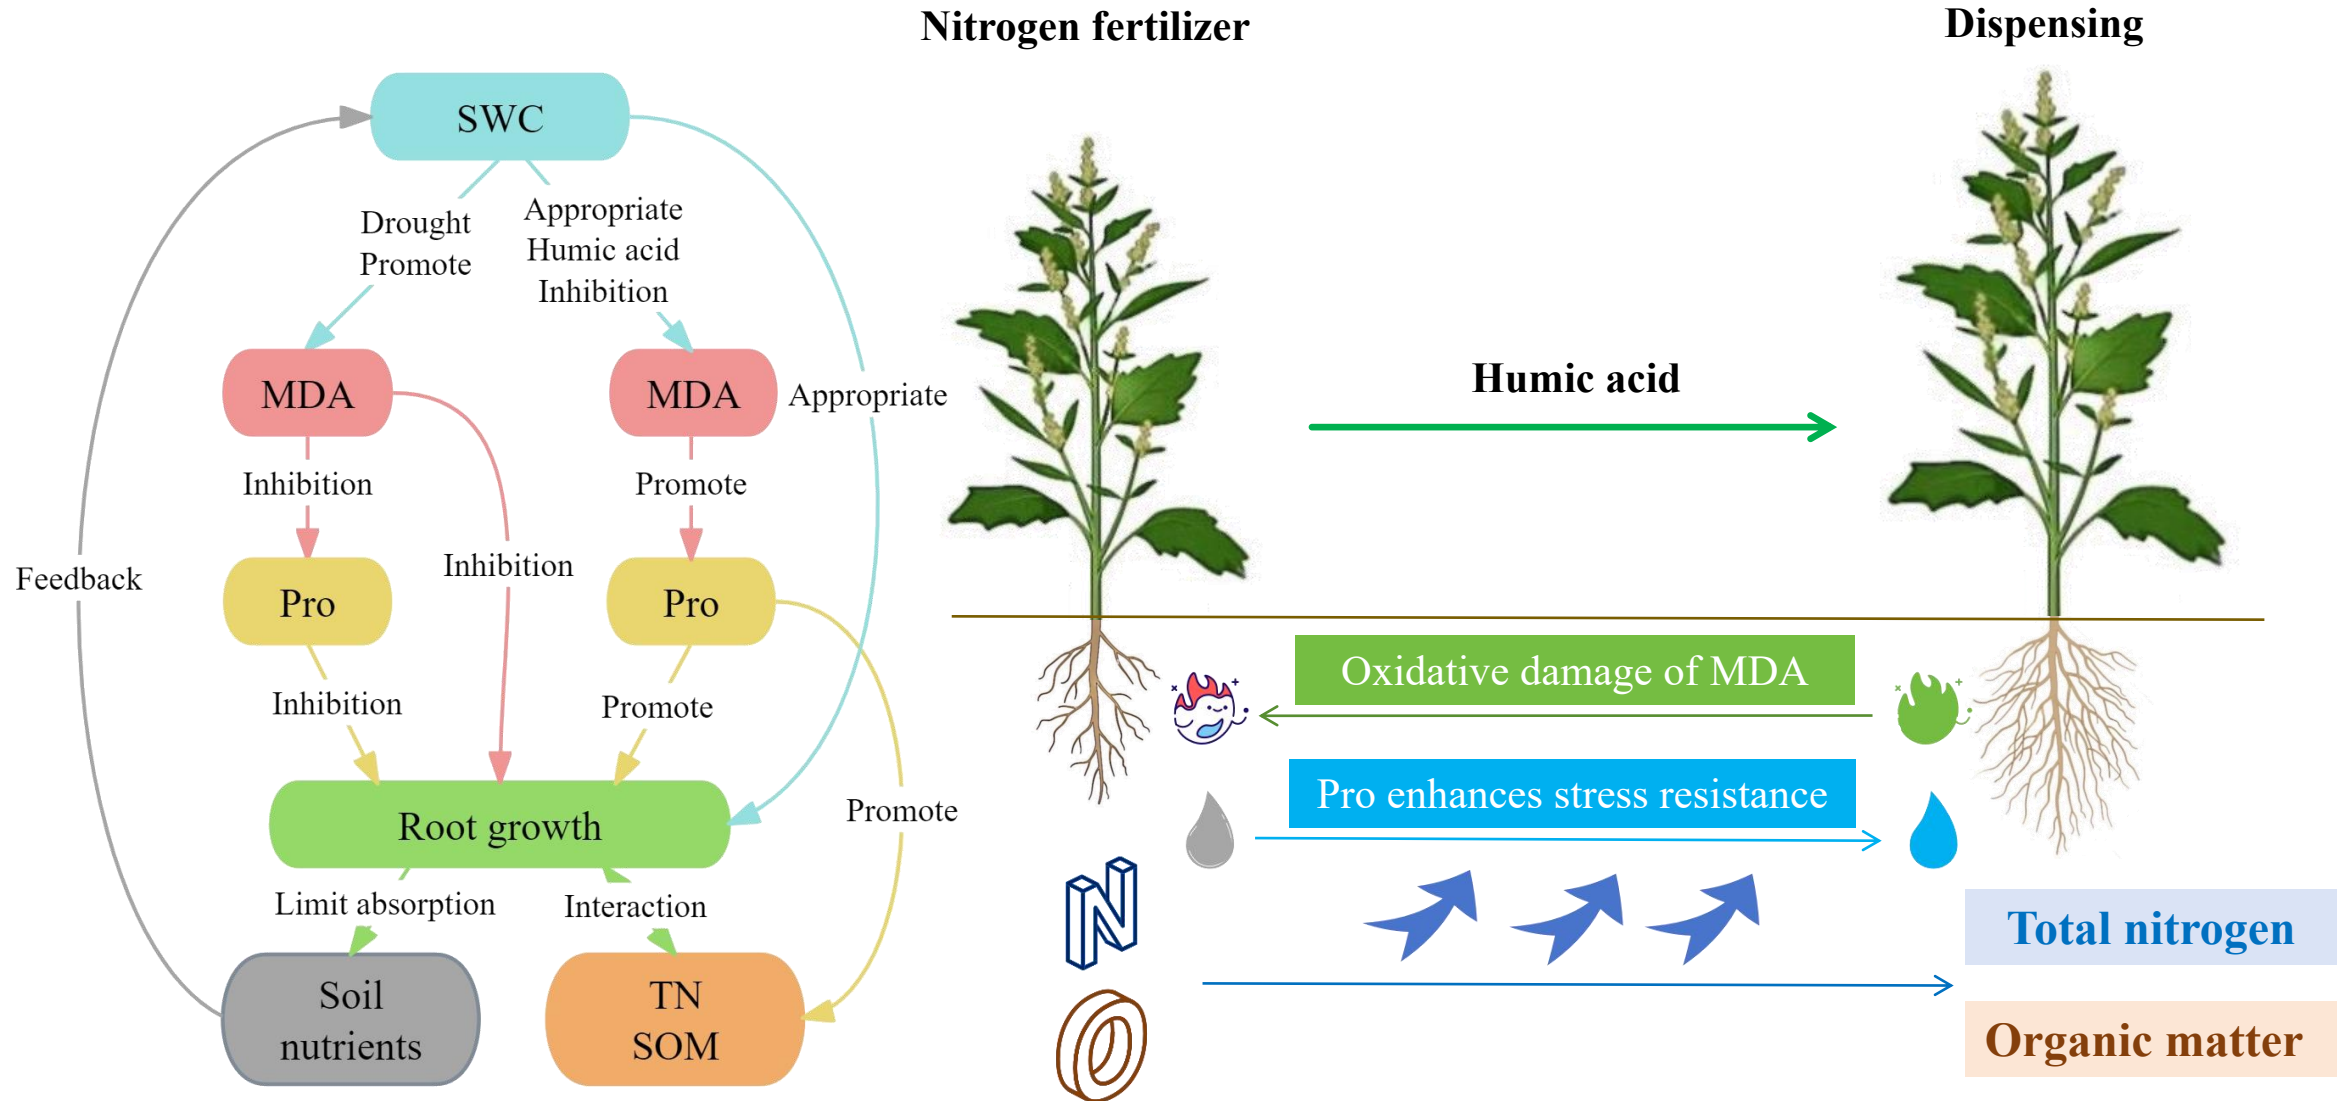

Supplement: Supplementary file 1 [file 1fe38c4e3fcecd482f36ae90.pdf]
