# Supplementary material for: Investigation on the Effects of Combined Application of Nitrogen Fertilizer and Humic Acid on the Root Morphology and Physiological Characteristics of Quinoa in Dryland Environment
Source: Research Square preprint supplement (doi:10.21203/rs.3.rs-7750221/v1), 2025-11-17
Supplement: Supplementary file 1 [file 7886e4a97f89f207f5cce089.docx]

**Figure S1** The relationship between different root morphological indicators and MDA and Pro content in 2023.

**Figure S2** The relationship between different root morphological indicators and MDA and Pro content in 2024.

**Figure S3** The relationship between different root morphological indicators and TN and SOM content in 2023.

**Figure S4** The relationship between different root morphological indicators and TN and SOM content in 2024.
